# Supplementary material
Source: Springer Nature journal article supplement (https://www.springermedizin.de/resource/supplementary/12939_2012_381_MOESM4_ESM.pdf/9551016)

# Correlates of Indebtedness

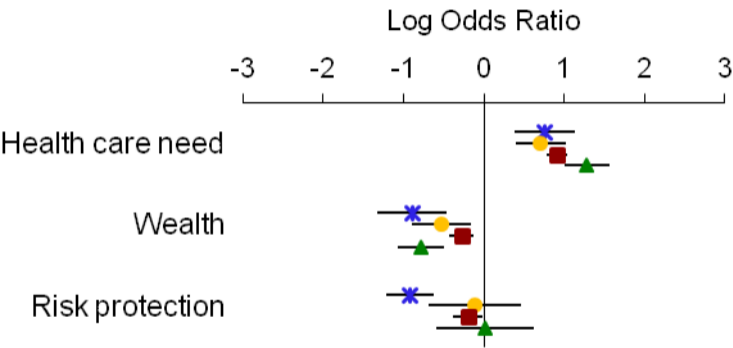

✖ China (n=3671)

● Malaysia (n=5259)

Supplement: MOESM4 [file 9551016]
